# Supplementary material for: A Model to Incorporate the bHLH Transcription Factor OsIRO3 within the Rice Iron Homeostasis Regulatory Network
Source: MDPI journal article supplement (doi:10.3390/ijms23031635), 2022-01-31
Supplement: s1 [file s1]

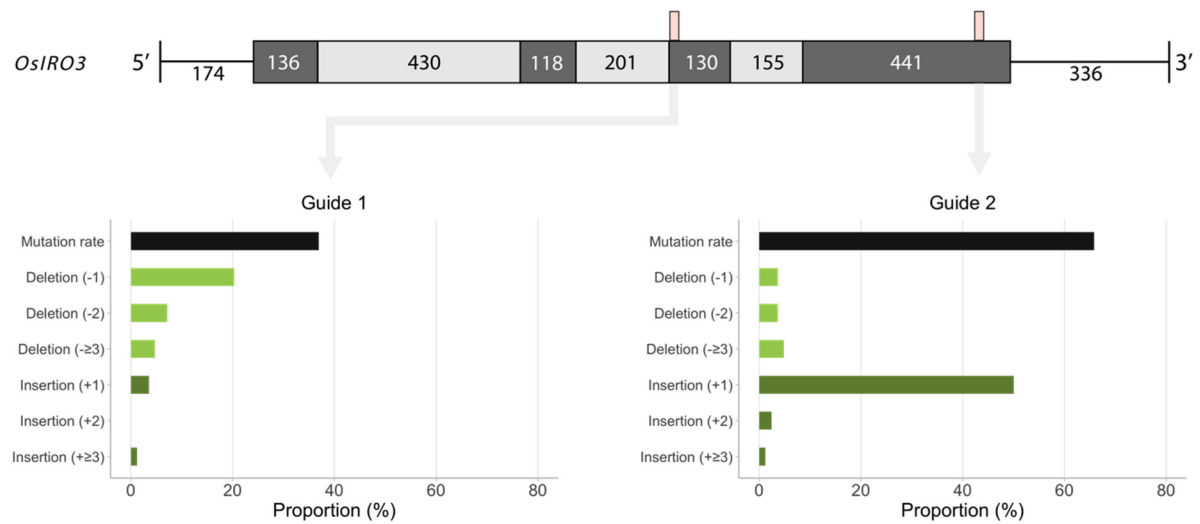

**Figure S1.** The proportion of different mutation rates at each guide RNA site of the *OsIRO3* gene. The gene structure of *OsIRO3* and target positions of guide RNAs (gRNA) are shown (pink). The coding sequences (black boxes), introns (grey boxes), and untranslated regions (lines) of *OsIRO3* are depicted with length (base pairs) provided. The corresponding proportion of different mutations achieved at gRNA 1 and gRNA 2 of the *OsIRO3* gene are calculated from 42 recovered T0 rice plants following transformation.

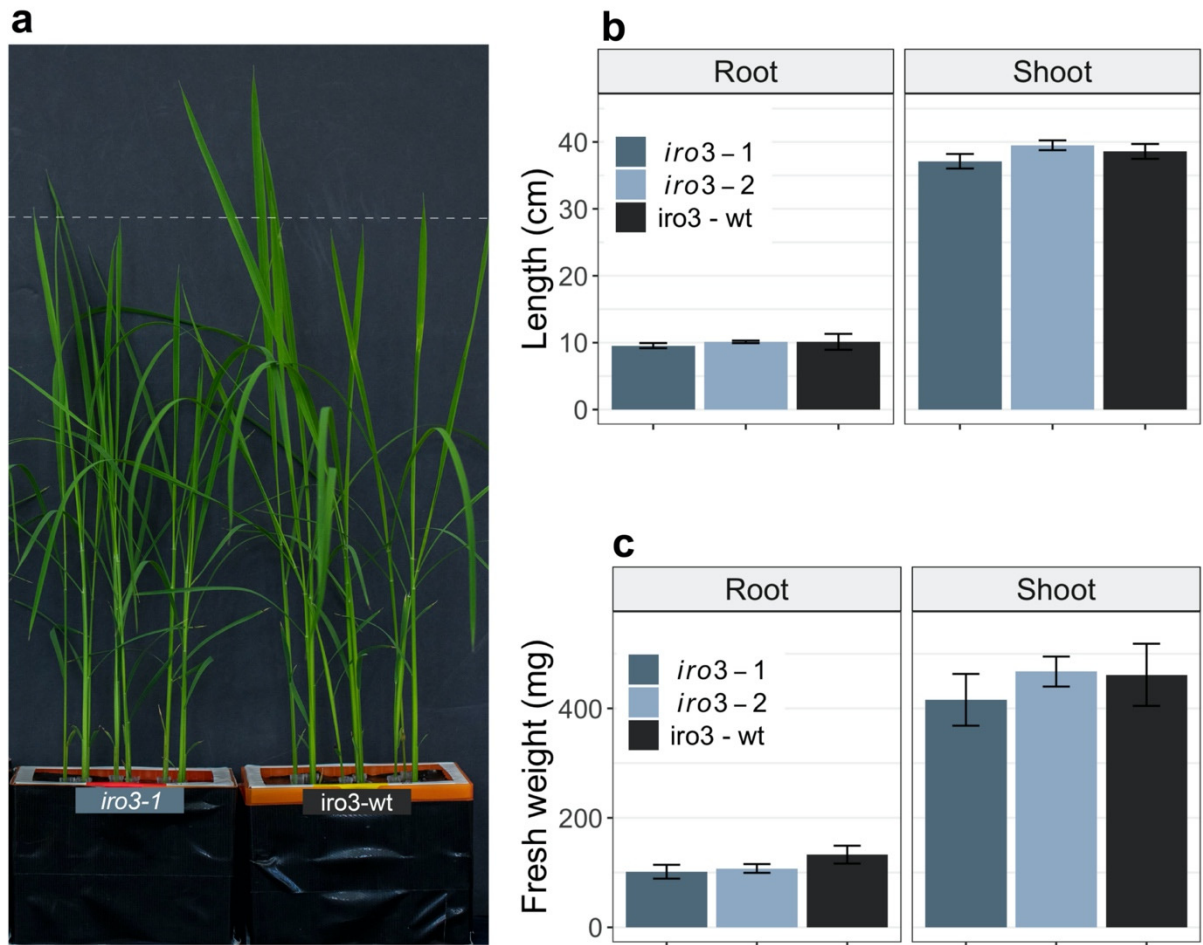

**Figure S2.** Phenotypic assessment of *iro3-1*, *iro3-2* and *iro3-wt* plants grown under hydroponic alkalinity stress conditions. **(a)** Representative *iro3-1* (navy blue) and *iro3-wt* (black) plants following 7 days of alkalinity stress and a 5 day recovery period. A dashed line is presented at a height of 40 cm. **(b,c)** Length (cm) and fresh weight (mg) of *iro3-1*, *iro3-2* and *iro3-wt* roots and shoots under hydroponic alkalinity stress conditions. Error bars indicate SEM of three biological replicates ( $n = 3$ ) where each biological replicate is comprised of three representative plants.

**Table S1.** Indicators of alkalinity stress in *iro3-1*, *iro3-2* and *iro3-wt* plants.

| <b>Genotype</b> | <b>Alkalinity<br/>Tolerance Score</b> | <b>Proportion of<br/>dead leaves</b> | <b>Total no. of dead<br/>plants</b> |
|-----------------|---------------------------------------|--------------------------------------|-------------------------------------|
| <i>iro3-1</i>   | 7.00                                  | 0.47                                 | 10                                  |
| <i>iro3-2</i>   | 7.67                                  | 0.63                                 | 11                                  |
| <i>iro3-wt</i>  | 7.00                                  | 0.47                                 | 8                                   |

**Table S2.** Primers used for quantitative RT-PCR analysis.

| <b>Gene</b>    | <b>Forward primer (5' – 3')</b> | <b>Reverse primer (3' – 5')</b> | <b>PCR product length (bp)</b> | <b>Annealing temperature (C°)</b> |
|----------------|---------------------------------|---------------------------------|--------------------------------|-----------------------------------|
| <i>OsIRO3</i>  | TCCATGGGCCTATCTCTGAC            | TGCCTATCCGCTTCTAGCAT            | 139                            | 60                                |
| <i>OsIRO2</i>  | TGGTTCAGGTCAGCTTGTTG            | GTCCTTCACTTCTCTGAAGATGG         | 166                            | 60                                |
| <i>OsYSL15</i> | GGAACAAGATGAACAAGAAGGAG         | CGAGAGCAAGGATAGAAGAAGG          | 108                            | 59                                |
| <i>OsIRT1</i>  | AGGTCGGTGCTCGTCTTCT             | TGTCCCTGTACACCCTGGTC            | 85                             | 60                                |
| <i>OsNAS1</i>  | AACTCCGTCATCGTCGCC              | GCAAACCTTTCTGCCTTCTCA           | 165                            | 61                                |
| <i>OsNAS2</i>  | GTCATCGTCGCTCGCAAG              | GAACTCTTCCGCCTTCTGG             | 152                            | 61                                |
| <i>OsNAAT1</i> | GTCCTCACAAGCCCGAAG              | TTCATTCCCAGCACACTCC             | 148                            | 59                                |
| <i>OsNAS3</i>  | GGTGATCAACTCCGTCATCA            | CTACGAGGAGGGCAGCTTCT            | 187                            | 60                                |
| <i>OsACT1</i>  | CTATGTTCCCTGGCATTGCT            | ACATCTGCTGGAATGTGCTG            | 156                            | 60                                |
| <i>OsELF1</i>  | GAAAGCAGCAGAAGAACGGG            | TCCTCAAGCTTTGCCATGTCT           | 126                            | 60                                |
| <i>OsP2</i>    | CTCCTTCTGGCCCTGTCTCT            | CCCCCTAGAATGTTCCCTGA            | 121                            | 61                                |
| <i>OsEF-1a</i> | CTGCTGCAACAAGATGGATG            | CAGTCAAGGTTGGTGGACCT            | 180                            | 60                                |
| <i>*OsIRO3</i> | <i>*GCGAGCTGGGTAATATGCTAGA</i>  | <i>*GGGCTCAATGACTGTTGGTT</i>    | 825                            | 60                                |

The asterisks indicate that these primers were used to detect the mRNA *OsIRO3* transcript using reverse transcription-PCR analysis.
